# Supplementary figures and images for: Functional evidence implicating chromosome 7q22 haploinsufficiency in myelodysplastic syndrome pathogenesis
Source: eLife journal article supplement (doi:10.7554/elife.07839), 2015-07-20

Figure 1 - Figure Supplement 1

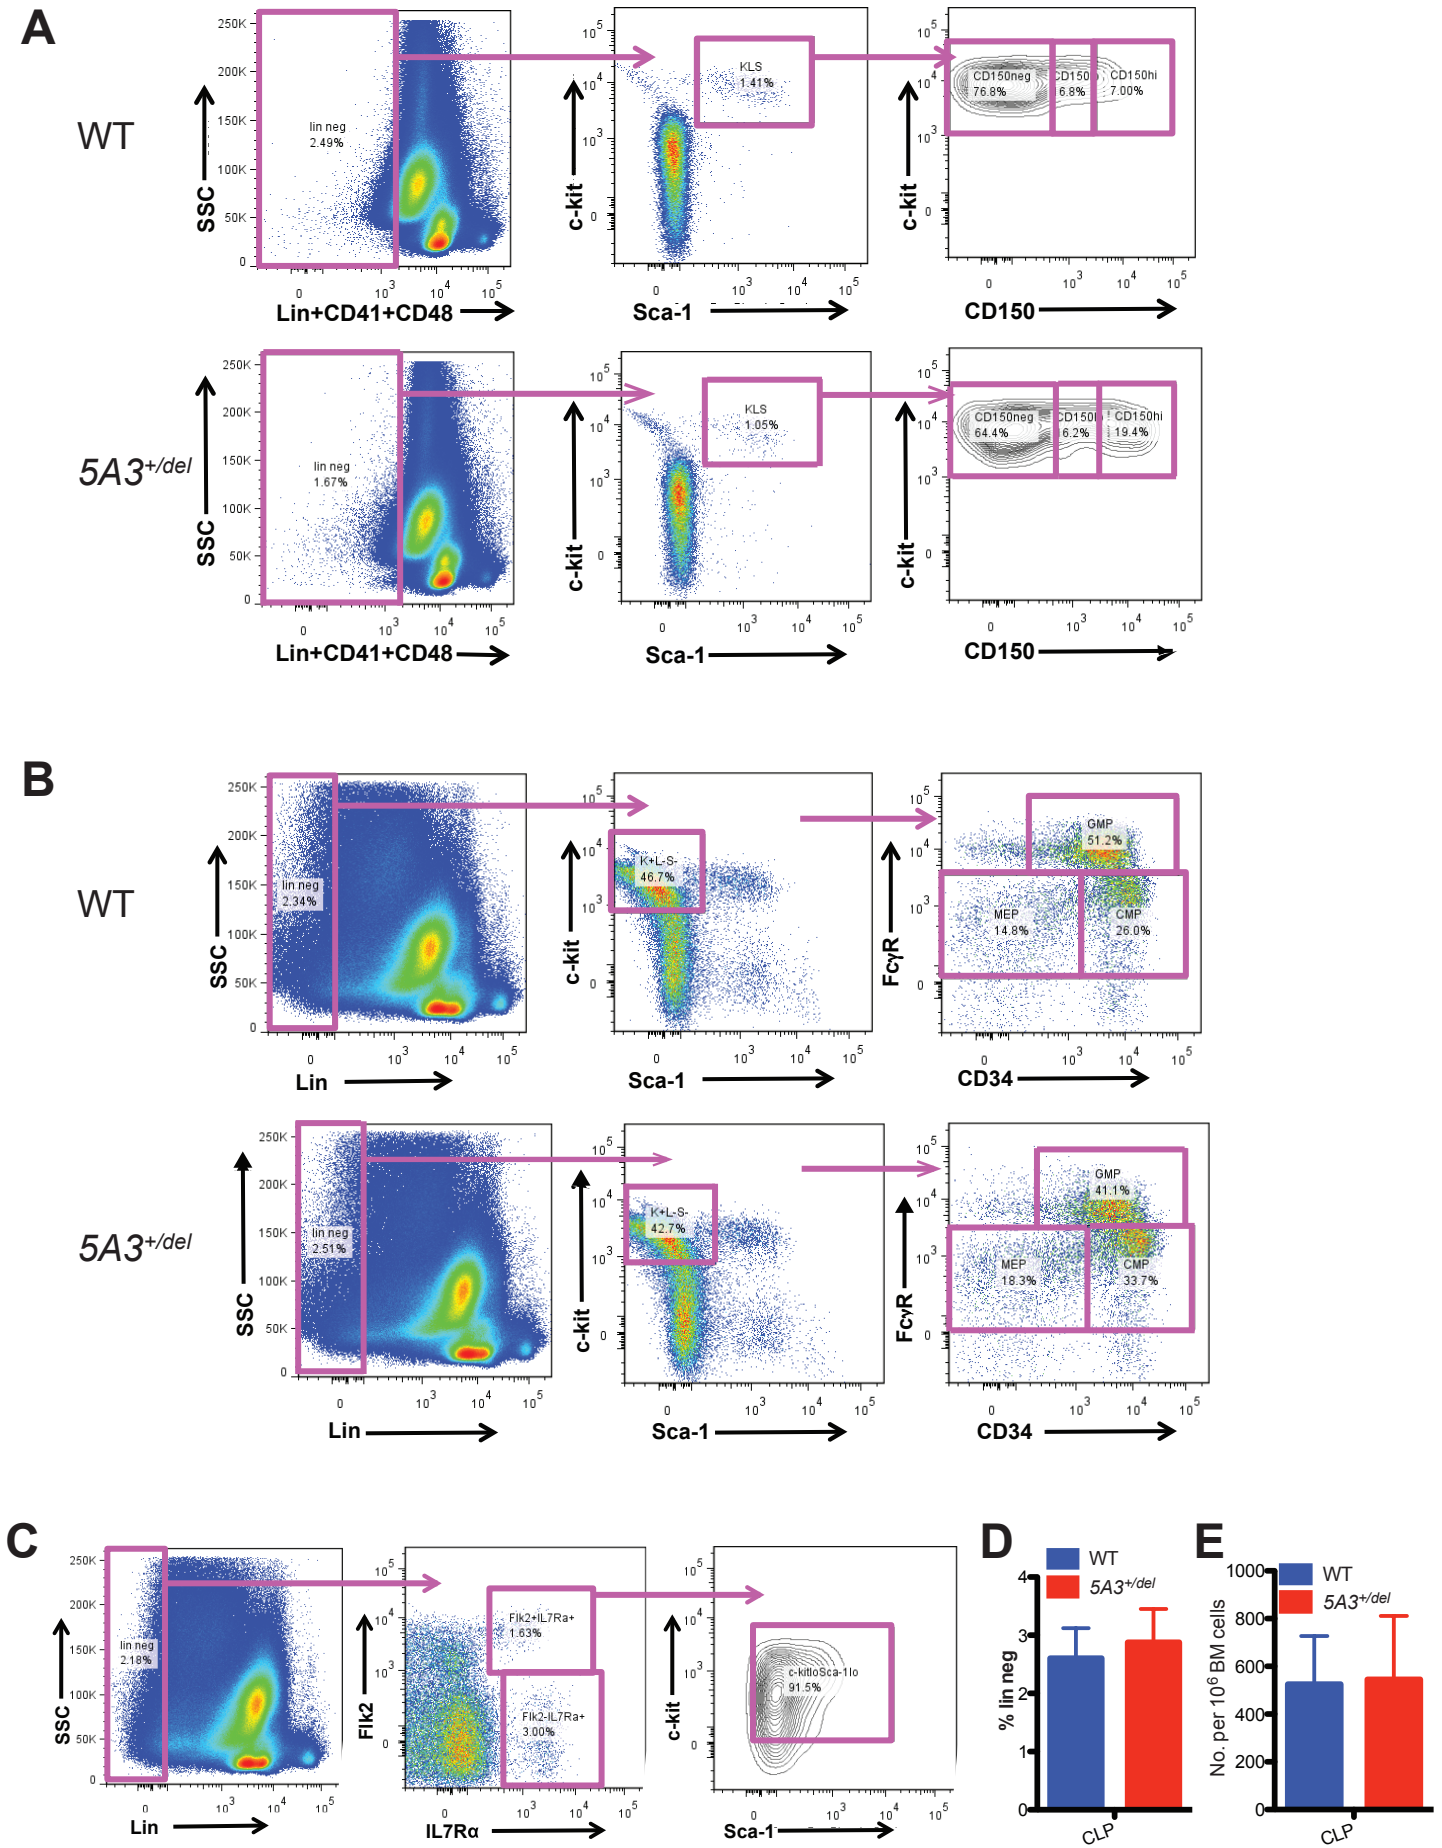

Supplement: supp [file elife-07839-supp-v1.zip]

Figure 2 - Figure Supplement 1

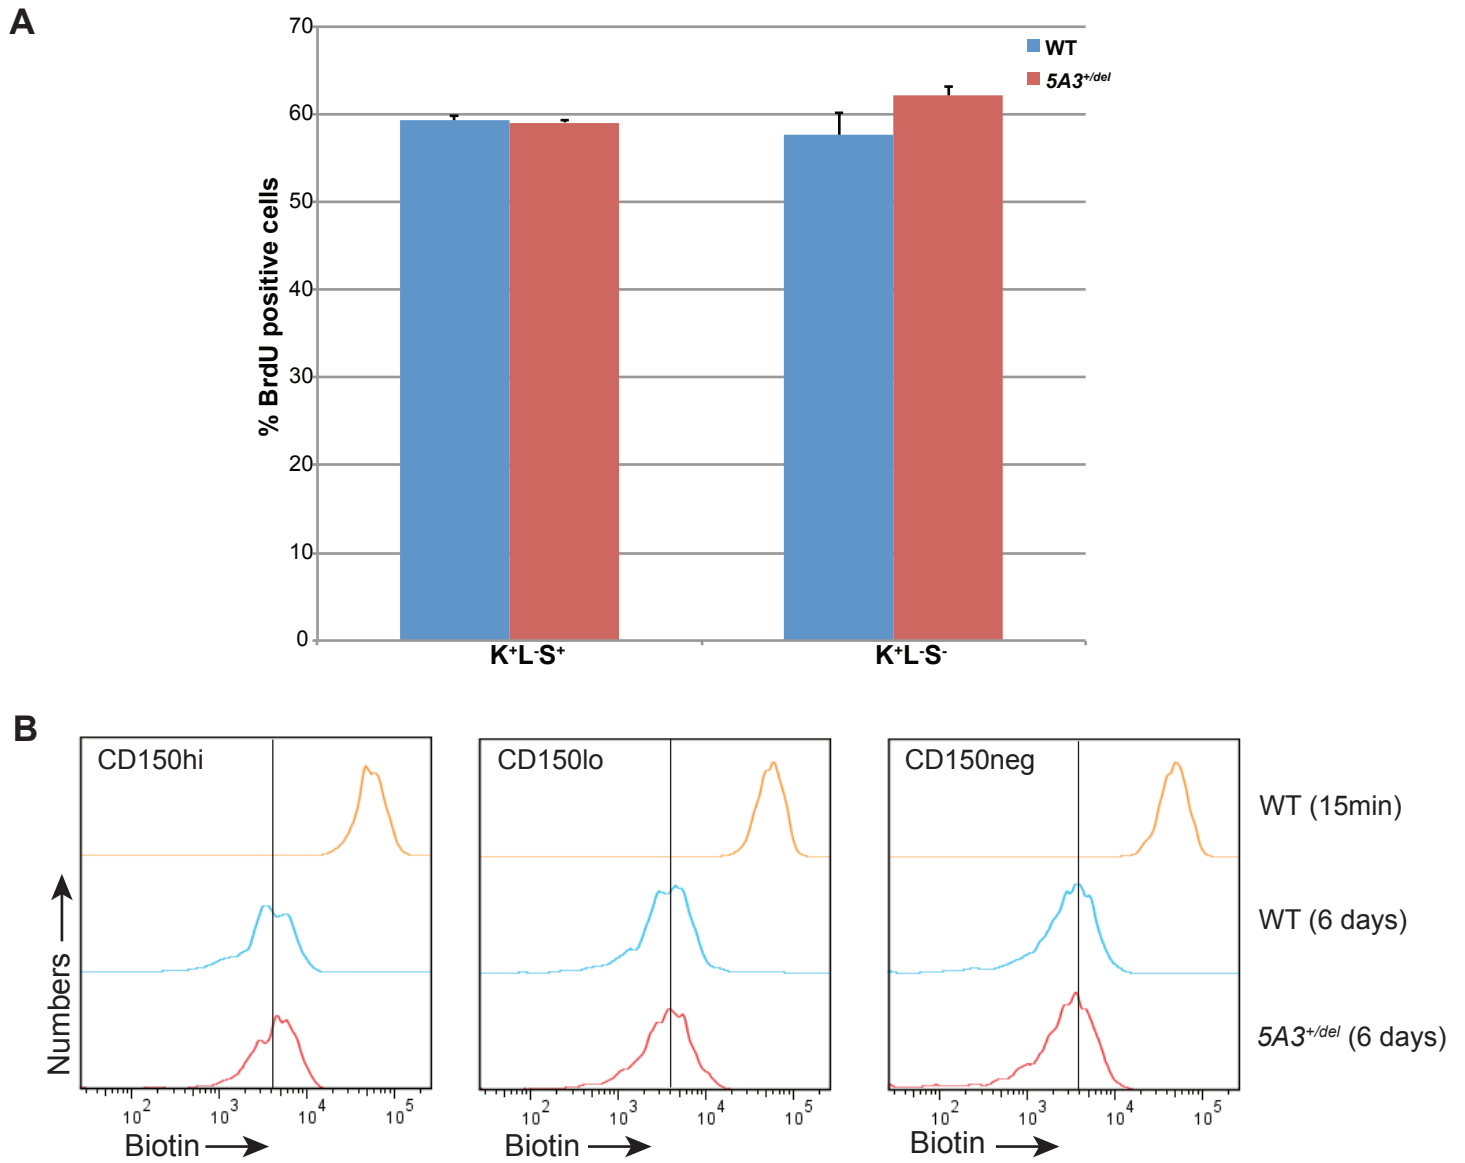

Supplement: supp [file elife-07839-supp-v1.zip]
